# Supplementary material
Source: publisher site journal article supplement (https://www.dovepress.com/article/250773)
Supplement: Supplementary file 1 [file get_supplementary_file.php]

Supporting information

**Long-Circulating Thermosensitive Liposomes for the Targeted Drug Delivery of Oxaliplatin**

Yanan Li1, Pengcheng Xu1, Dongsheng He1, Bohui Xu2, Jiasheng Tu1*, Yan Shen1*

11China Pharmaceutical University, Center for Research Development and Evaluation of Pharmaceutical Excipients and Generic Drugs, 24 Tong Jia Xiang, Nanjing 210009, China

2School of Pharmacy, Nantong University, Nantong, 226001, China

Correspondence: Jiasheng Tu, Yan Shen, Tel +86-025-83271305,Fax +86-025-83271305

Email : jiashengtu@aliyun.com (J. Tu) and shenyan@cpu.edu.cn

Figure S1 The standard curve of L-OHP (HPLC). The trend line equation was y = 0.1125x + 0.0984, R² = 0.99892
